# Supplementary material
Source: Springer Nature journal article supplement (https://www.springermedizin.de/resource/supplementary/12935_2013_595_MOESM2_ESM.pdf/9540748)

EpCAM

(FITC)

Cytokeratin

(PerCP Cy5.5)

DAPI

(Nuclear counterstain)

Overlay

Day 0 Control

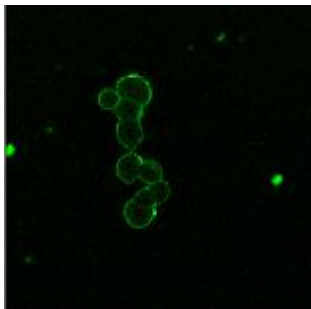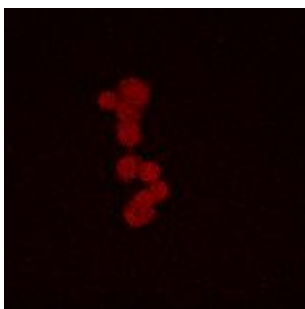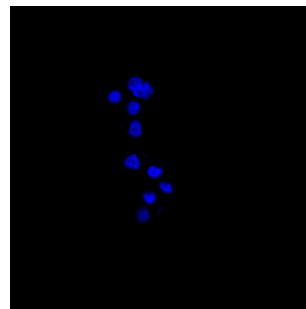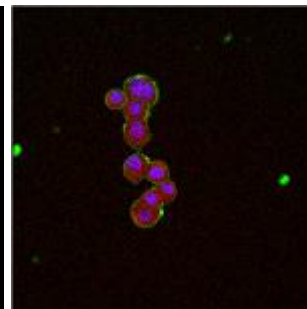

EDTA Day 4

Degraded cells

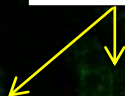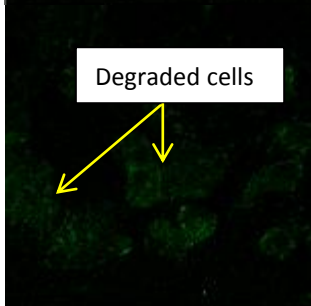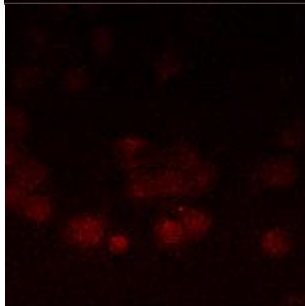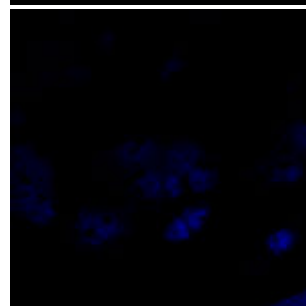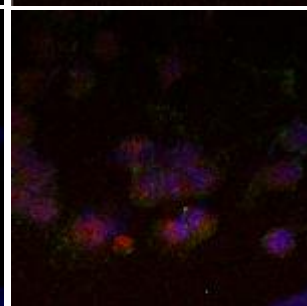

Cell-Free DNA  
BCT Day 4

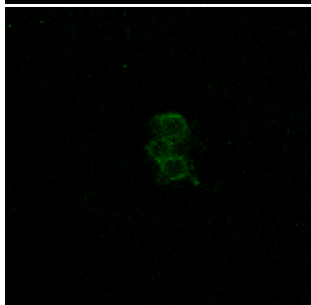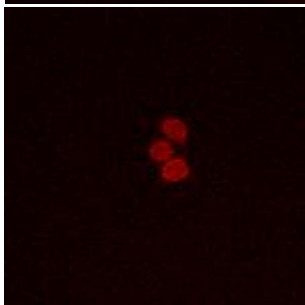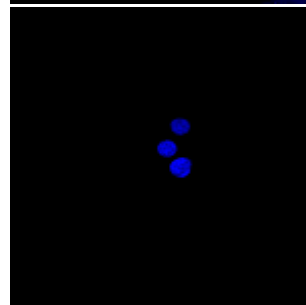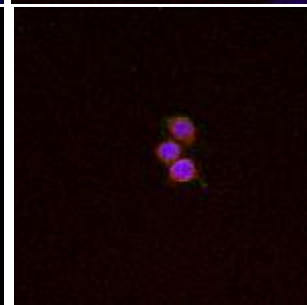

Supplement: MOESM2 [file 9540748]
